# Supplementary material for: Development and validation of a risk index to predict kidney graft survival: the kidney transplant risk index
Source: Springer Nature journal article supplement (doi:10.1186/s12874-021-01319-5), 2021-06-21
Supplement: MOESM1 [file 19279494]

## Supplementary material

### *Development and validation of a risk index to predict kidney graft survival: the Kidney Transplant Risk Index*

Sameera Senanayake<sup>1</sup>; Sanjeewa Kularatna<sup>1</sup>; Helen Healy<sup>2,3</sup>; Nicholas Graves<sup>4</sup>; Keshwar Baboolal<sup>2,3</sup>; Matthew P. Sypek<sup>5</sup>; Adrian Barnett<sup>1</sup>

<sup>1</sup> Australian Centre for Health Services Innovation (AusHSI) and Centre for Healthcare Transformation, School of Public Health & Social Work, Queensland University of Technology (QUT), Brisbane, Queensland, Australia

<sup>2</sup> Royal Brisbane and Women's Hospital, Brisbane, Australia

<sup>3</sup> School of Medicine, University of Queensland, Australia

<sup>4</sup> Duke-NUS Medical School, Singapore

<sup>5</sup> Australia and New Zealand Dialysis and Transplant (ANZDATA) Registry, Adelaide, South Australia, Australia

#### **Corresponding author**

*Sameera Senanayake*

Australian Centre for Health Services Innovation,  
Queensland University of Technology,  
60 Musk Ave, Kelvin Grove, QLD 4059, Australia

[s2.senanayake@qut.edu.au](mailto:s2.senanayake@qut.edu.au)

[+61450865361](tel:+61450865361)

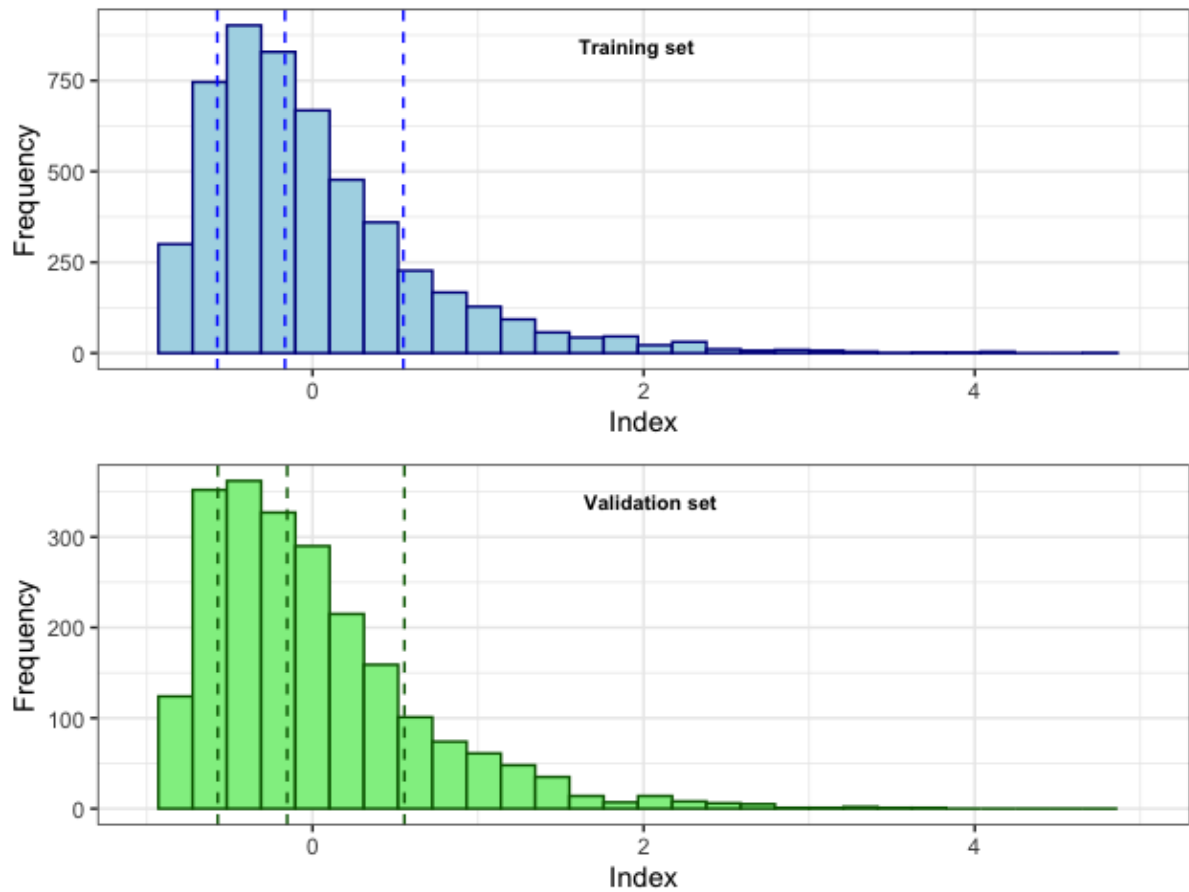

**Supplementary figure 1** : Histogram of the index in the training and validation datasets of the best fitting Cox model.

*The index was centered on the mean in the training dataset. The vertical lines show the 16th, 50th and 84th centiles of the index in each dataset.*
